# Supplementary material for: Activation of AMPK/p38/Nrf2 is involved in resveratrol alleviating myocardial ischemia-reperfusion injury in diabetic rats as an endogenous antioxidant stress feedback
Source: PubMed Central journal article supplement — Ann Transl Med. 2022 Aug;10(16):890. doi: 10.21037/atm-22-3789 (PMC9469109; doi:10.21037/atm-22-3789), 2022-08
Supplement: atm-10-16-890-dss.pdf [file atm-10-16-890-dss.pdf]

## Data Sharing Statement

|                     |                                                                                                                                                     |                                                                                                                                     |
|---------------------|-----------------------------------------------------------------------------------------------------------------------------------------------------|-------------------------------------------------------------------------------------------------------------------------------------|
| <b>Article Info</b> | <a href="https://dx.doi.org/10.21037/atm-22-3789">https://dx.doi.org/10.21037/atm-22-3789</a>                                                       |                                                                                                                                     |
| <b>Item</b>         | <b>Question</b>                                                                                                                                     | <b>Authors' Response<br/>(place "-" if not applicable)</b>                                                                          |
| 1                   | Would you like to share data collected for your study to others?                                                                                    | Yes.                                                                                                                                |
| 2                   | If not, would you like to share the reason for your decision?                                                                                       | -                                                                                                                                   |
| 3                   | What data in particular will be shared?                                                                                                             | Data on upstream and downstream associations of signaling pathways will be shared, especially with respect to endogenous protection |
| 4                   | Any other documents will be shared? Such as study protocol, statistical analysis plan, informed consent form, clinical study report, analytic code. | Statistical analysis plan, Research plan and clinical study report will also be shared if requested.                                |
| 5                   | When will data availability begin?                                                                                                                  | From the publication date.                                                                                                          |
| 6                   | When will data availability end?                                                                                                                    | Two years within the publication date, since the technique or data may be updated over time.                                        |
| 7                   | To whom will you share the data?                                                                                                                    | Anesthesiologist and interested in myocardial ischemia-reperfusion                                                                  |
| 8                   | For what type of analysis or purpose?                                                                                                               | To evaluate the myocardial protective effect of diabetic rats                                                                       |
| 9                   | How or where can the data/documents be obtained?                                                                                                    | Emails could be sent to the address below to obtain the shared data: 531571201@qq.com                                               |
| 10                  | Any other restrictions?                                                                                                                             | We may balance the potential benefits and risks for each request and then provide the data that could be shared.                    |
